# Supplementary material for: Eye Pain Caused by Epithelial Damage in the Central Cornea in Aqueous-Deficient Dry Eye
Source: MDPI journal article supplement (doi:10.3390/diagnostics14010030), 2023-12-22
Supplement: s1 [file s1]

Supplementary Table S1. Correlation between subjective symptoms of dry eye evaluated by VAS and SF-MPQ-2 evaluated by points

| n=57                          | SF-MPQ-2        |        |                   |        |                  |        |                       |        |             |        |
|-------------------------------|-----------------|--------|-------------------|--------|------------------|--------|-----------------------|--------|-------------|--------|
|                               | Continuous pain |        | Intermittent pain |        | Neuropathic pain |        | Affective descriptors |        | Total pain  |        |
| VAS                           | R               | p      | R                 | p      | R                | p      | R                     | p      | R           | p      |
| Dryness                       | 0.37            | 0.01   | 0.48              | 0.0003 | 0.32             | 0.02   | <u>0.65</u>           | <.0001 | <u>0.56</u> | <.0001 |
| Blurred vision                | <u>0.54</u>     | <.0001 | 0.31              | 0.03   | 0.39             | 0.004  | 0.33                  | 0.01   | 0.44        | 0.001  |
| Sensitivity to light          | 0.49            | 0.0002 | 0.43              | 0.001  | 0.44             | 0.0009 | 0.44                  | 0.001  | <u>0.53</u> | <.0001 |
| Eye fatigue                   | <u>0.57</u>     | <.0001 | 0.42              | 0.002  | 0.36             | 0.008  | <u>0.66</u>           | <.0001 | <u>0.60</u> | <.0001 |
| Heavy eyelids                 | <u>0.55</u>     | <.0001 | 0.34              | 0.01   | 0.35             | 0.01   | <u>0.54</u>           | <.0001 | <u>0.55</u> | <.0001 |
| Eye pain                      | <u>0.63</u>     | <.0001 | <u>0.58</u>       | <.0001 | <u>0.63</u>      | <.0001 | <u>0.59</u>           | <.0001 | <u>0.75</u> | <.0001 |
| Foreign body sensation        | 0.41            | 0.002  | 0.48              | 0.0003 | 0.39             | 0.004  | 0.43                  | 0.001  | <u>0.52</u> | <.0001 |
| Difficulty in opening the eye | <u>0.53</u>     | <.0001 | <u>0.55</u>       | <.0001 | 0.49             | 0.0002 | <u>0.58</u>           | <.0001 | <u>0.67</u> | <.0001 |
| Redness                       | 0.28            | 0.05   | 0.18              | 0.19   | 0.15             | 0.28   | 0.20                  | 0.14   | 0.25        | 0.08   |
| Tearing                       | 0.33            | 0.02   | 0.22              | 0.12   | 0.32             | 0.02   | 0.22                  | 0.12   | 0.33        | 0.02   |
| Itchiness                     | 0.42            | 0.002  | 0.17              | 0.22   | 0.19             | 0.16   | 0.34                  | 0.01   | 0.34        | 0.01   |
| Discharge                     | 0.23            | 0.09   | 0.30              | 0.03   | 0.14             | 0.31   | 0.27                  | 0.05   | 0.32        | 0.02   |

VAS: visual analog scale; SF-MPQ-2: Short-Form McGill Pain Questionnaire 2; R: Spearman's rank correlation coefficient

Underline is added when the absolute value of R is 0.5 or more.
